# Supplementary material
Source: MDPI journal article supplement (https://www.mdpi.com/2073-4441/11/5/983)

# Supplementary Materials – S1. Interviews (anonymized and randomized)

## Helicopter interviews

| Role            | Organisation      | Type                              |
|-----------------|-------------------|-----------------------------------|
| Architect       | De Urbanisten     | Company                           |
| Program Manager | VNG International | Policymaker, network organisation |

## In-depth focus interviews

| Role                                            | Organisation                                    | Type                              |
|-------------------------------------------------|-------------------------------------------------|-----------------------------------|
| Professor                                       | National Autonomous University of Mexico (UNAM) | Academic                          |
| Designer                                        | National Autonomous University of Mexico (UNAM) | Academic                          |
| Associate Professor                             | UNESCO-IHE Institute for Water Education        | Academic                          |
| Associate Director City and Practice Management | 100 Resilient Cities                            | Network organisation              |
| Project Officer International                   | Netherlands Water Partnership (NWP)             | Network organisation              |
| Advisor on Water and Sustainability             | Netherlands Embassy in Mexico City              | Network organisation              |
| Director Communication & Education              | Ambiental                                       | NGO                               |
| Director Urban Development and Economy          | CtsEMBARQ                                       | NGO                               |
| Program Manager                                 | VNG International                               | Policymaker, network organisation |
| Project Director                                | AEP Public Space Authority of Mexico-City       | Policymaker                       |

## In-depth contextual interviews

| Role                                                     | Organisation                                    | Type        |
|----------------------------------------------------------|-------------------------------------------------|-------------|
| Marketing Manager                                        | Philips                                         | Company     |
| Head of External Affairs for Mexican & Greater Caribbean | Unilever                                        | Company     |
| Director                                                 | Information Group of Reproductive Choice (GIRE) | NGO         |
| Manager Economics and Commercial                         | EU Delegation                                   | Policymaker |
| Press and Public Diplomacy Officer                       | EU Delegation                                   | Policymaker |
| Chief Representative Officer                             | Nuffic Neso                                     | Policymaker |
| Consul                                                   | Netherlands Consulate Cancún                    | Policymaker |
| Consul                                                   | Netherlands Consulate Monterey                  | Policymaker |

## Supplementary Materials—S2. Coding Scheme

| Interview                  | Mechanisms | Question                                                                               |
|----------------------------|------------|----------------------------------------------------------------------------------------|
| # (numbered consecutively) | 0. Other   | G<br>KT                                                                                |
|                            | 1. Phase 1 | G 0. No A1<br>E IP<br>M CR                                                             |
|                            | 2. Phase 2 | G<br>C<br>A<br>MT<br>ST<br>SU<br>RE                                                    |
|                            | 3. Phase 3 | G G 1. Yes G<br>B-L D1 KT<br>I-L D2 A1<br>GO-L D3 IP<br>B-G D4 CR<br>I-G D5<br>GO-G D6 |
|                            | 4. Phase 4 | I1<br>R                                                                                |

| Coding scheme acronyms and symbols |                                                    |
|------------------------------------|----------------------------------------------------|
| G                                  | General                                            |
| E                                  | Exploring                                          |
| M                                  | Marketing                                          |
| C                                  | Strategic program: Needs of the community          |
| A                                  | Strategic program: Connection for different actors |
| MT                                 | Strategic program: Clear and defined metrics       |
| ST                                 | Strategic program: Broadly owned by stakeholders   |
| SU                                 | Strategic program: Broader sustainability agenda   |
| RE                                 | Strategic program: Reviewed for reflection         |
| B                                  | Businesses                                         |
| GO                                 | Government                                         |
| I                                  | Institutions                                       |
| -L                                 | Local actors                                       |
| -G                                 | Global actors                                      |
| D1                                 | Institutional dimension 1: Variety                 |
| D2                                 | Institutional dimension 2: Learning                |
| D3                                 | Institutional dimension 3: Behaviour               |
| D4                                 | Institutional dimension 4: Leadership              |
| D5                                 | Institutional dimension 5: Resources               |
| D6                                 | Institutional dimension 6: Fair governance         |
| I1                                 | Internalization                                    |
| R                                  | Robustness                                         |
| KT                                 | Sub question: Mechanisms knowledge transfer        |
| A1                                 | Sub question: Involvement actors                   |
| IP                                 | Sub question: Institutional proximity              |
| CR                                 | Sub question: Concept resilience                   |

# Supplementary Materials—S3. Temperature and precipitation profiles for Rotterdam and Mexico City

Source: Meteoblue (2019), used under Creative Commons license "Attribution + Non-commercial (BY-NC)".

Rotterdam: [https://www.meteoblue.com/en/weather/forecast/modelclimate/rotterdam\\_netherlands\\_2747891](https://www.meteoblue.com/en/weather/forecast/modelclimate/rotterdam_netherlands_2747891)

Mexico City: [https://www.meteoblue.com/en/weather/forecast/modelclimate/mexico-city\\_mexico\\_3530597](https://www.meteoblue.com/en/weather/forecast/modelclimate/mexico-city_mexico_3530597)

Based on past 30 years.

## Rotterdam

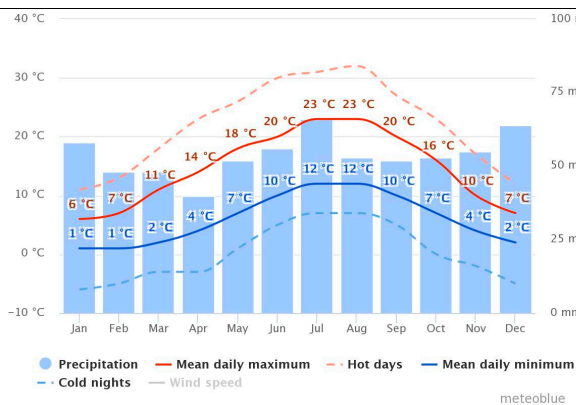

## Mexico City

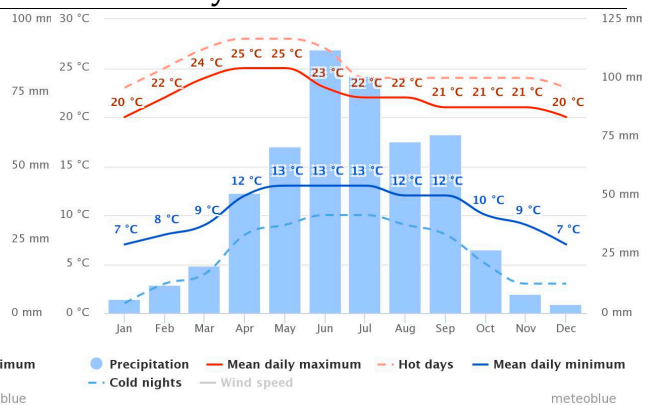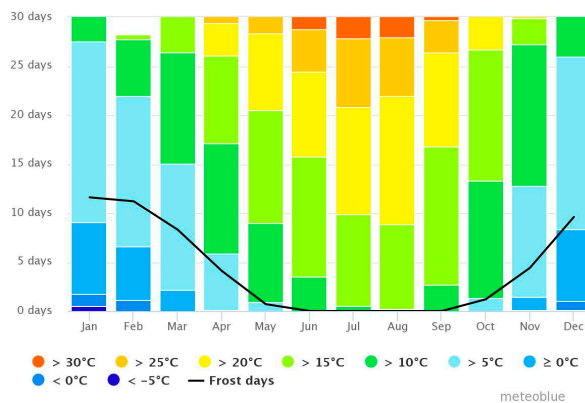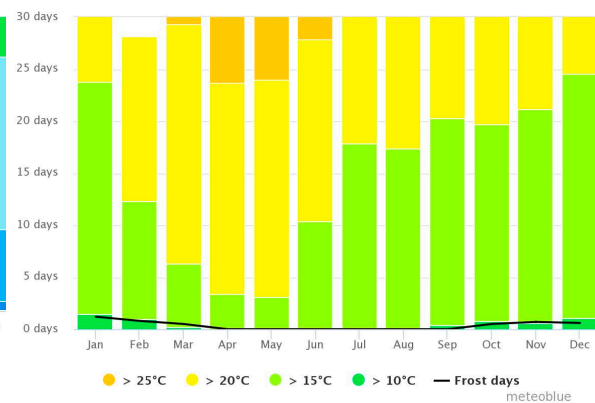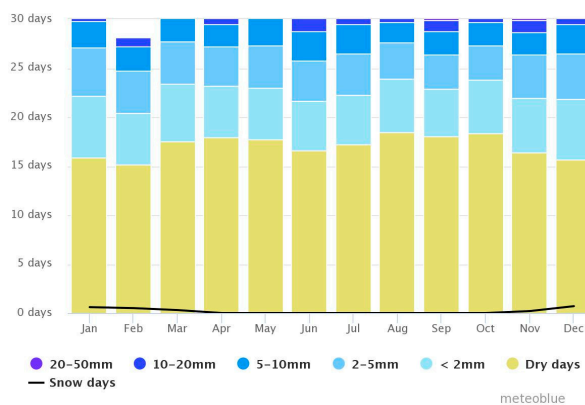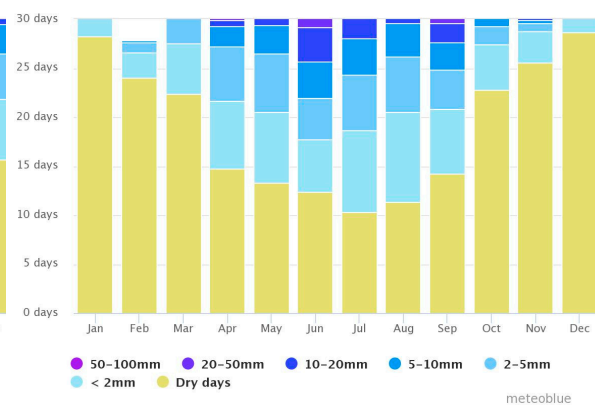

Supplement: s1 [file s1]
